# Supplementary material
Source: PubMed Central journal article supplement (PMC4603655)
Supplement: NIHMS724724-supplement-Table_1.pdf [file NIHMS724724-supplement-Table_1.pdf]

**Table S1. Proteins identified in *P. gingivalis* vesicles by mass spectrometer.**

|                                                  | Protein description                                              |                                          |
|--------------------------------------------------|------------------------------------------------------------------|------------------------------------------|
| 33277 [1, 2]                                     | W50 [3]                                                          | W83 [2]                                  |
| Lys-gingipain, Kgp                               | TPR domain protein, P61                                          | Lipoprotein, RagA                        |
| Arg-gingipain, RgpA                              | thioredoxin family protein                                       | Hemagglutinin protein, HagE              |
| Receptor antigen A, RagA                         | hypothetical protein PG1093                                      | Lipoprotein, RagB                        |
|                                                  | hypothetical protein PG1215                                      | Uncharacterized protein, PG_0027         |
| Arg-gingipain, RgpB                              |                                                                  | Gingipain, RgpB                          |
| Major fimbrial subunit protein type-1, FimA      | hypothetical protein PG1341                                      |                                          |
| Probable peptidylarginine deiminase, PGN_0898    | hypothetical protein PG1351                                      | Hemagglutinin A, HagA                    |
|                                                  | HmuY protein                                                     | Immunoreactive 61 kDa antigen, PG_2102   |
| Receptor antigen B, RagB                         |                                                                  | Uncharacterized protein, PG_1823         |
| Por secretion system protein, PorV               | carboxyl-terminal protease-related protein lipoprotein, putative | Peptidylarginine deiminase, PG_1424      |
| Mfa1 fimbriin, Mfa1                              | hypothetical protein PG1757                                      | Uncharacterized protein, PG_2106         |
| Hemagglutinin protein, HagA                      |                                                                  | Uncharacterized protein, PG_1881         |
| Putative uncharacterized protein, PGN_0154       | hypothetical protein PG1835                                      | Putative extracellular protease, PG_0553 |
| Putative uncharacterized protein, PGN_0335       | hypothetical protein PG1881                                      | Lipoprotein, putative, PG_2105           |
| Immunoreactive 61 kDa antigen, PGN_0152          | hypothetical protein PG1889                                      | Heme-binding protein, FetB               |
| Probable immunoreactive 23 kDa antigen, PGN_0482 | hypothetical protein PG1948                                      |                                          |
| Putative uncharacterized protein, PGN_1744       | lipoprotein PG3                                                  | Uncharacterized protein, PG_1626         |
| 35 kDa hemin binding protein, PGN_0659           | hypothetical protein PG2105                                      | Outer membrane protein 40, PG_0694       |
| Putative uncharacterized protein, PGN_0693       | peptidyl-prolyl cis-trans isomerase                              | Outer membrane protein 41, PG_0695       |
| Putative uncharacterized protein, PGN_0458       | outer membrane lipoprotein Omp28                                 | Uncharacterized protein, PG_0448         |
| Putative uncharacterized protein, PGN_0289       | conserved hypothetical protein PG2197                            | HtrA protein                             |
| Immunoreactive 47 kDa antigen, PGN_0852          | fimbriin                                                         | Immunoreactive 47 kDa antigen, PG_1374   |
| Putative uncharacterized protein, PGN_0477       | cationic outer membrane protein OmpH                             | Uncharacterized protein, PG_1889         |
| Immunoreactive 46 kDa antigen, PGN_1767          | cationic outer membrane protein OmpH                             | TPR domain protein, PG_1385              |
| NAD-specific glutamate dehydrogenase, Gdh        | peptidase, M16 family                                            | Uncharacterized protein, PG_1795         |

|                                                                 |                                       |                                                       |
|-----------------------------------------------------------------|---------------------------------------|-------------------------------------------------------|
| Putative uncharacterized protein, PGN_0795                      | thioredoxin                           | PDZ domain protein, PG_1726                           |
| Putative uncharacterized protein, PGN_1557                      | hypothetical protein PG0319           | Uncharacterized protein, PG_0409                      |
| Trypsin like proteinase, PrtT                                   | TPR domain protein                    | Outer membrane lipoprotein, Omp28                     |
| Putative uncharacterized protein, PGN_2080                      | conserved hypothetical protein PG0491 | TonB-dependent receptor, putative, PG_0707            |
| Putative uncharacterized protein, PGN_0156                      | hypothetical protein PG0613           | Uncharacterized protein, PG_0026                      |
| Putative uncharacterized protein, PGN_1611                      | hypothetical protein PG0698           | Uncharacterized protein, PG_2216                      |
| Probable lysyl endopeptidase, PGN_1416                          | peptidyl-prolyl cis-trans isomerase   | Zinc carboxypeptidase, putative, PG_0232              |
| Immunoreactive 32 kDa antigen, PGN_0290                         | prolyl oligopeptidase family protein  | Prolyl oligopeptidase family protein, PG_1004         |
| Putative uncharacterized protein, PGN_0123                      | flavodoxin, putative                  | Lipoprotein, putative, PG_1835                        |
| C-terminal domain of Arg-and Lys-gingipain proteinase, PGN_0295 | peptidyl-prolyl cis-trans isomerase   | Uncharacterized protein, PG_0602                      |
| Putative uncharacterized protein, PGN_1816                      | conserved hypothetical protein PG1283 | HmuY protein                                          |
| Thiol protease, PGN_0900                                        | conserved domain protein PG1313       | TPR domain protein, PG_1028                           |
| Putative uncharacterized protein, PGN_0129                      | TPR domain protein                    | Lipoprotein, putative, PG_0188                        |
| Putative uncharacterized protein, PGN_0558                      | hypothetical protein PG1388           | Uncharacterized protein, PG_1382                      |
| Outer membrane protein 41, PGN_0729                             | hypothetical protein PG1634           | Glyceraldehyde 3-phosphate dehydrogenase, type I GapA |
| Putative uncharacterized protein, PGN_0291                      | PDZ domain protein                    | Ferritin, Ftn                                         |
| Minor component, FimE                                           | thiol peroxidase                      | NAD-specific glutamate dehydrogenase, Gdh             |
| Minor component, FimD                                           | fructose-bisphosphate aldolase        | Thioredoxin, putative, PG_0616                        |
| 28 kDa outer membrane protein Omp28, PGN_0122                   | cysteine peptidase, putative          | Uncharacterized protein, PG_1786                      |
| Ferritin, PGN_0604                                              | hypothetical protein PG1850           | Uncharacterized protein, PG_2174                      |
| Outer membrane protein 40, PGN_0728                             | hypothetical protein PG2083           | Peptidase, M16 family, PG_0196                        |
| Immunoreactive 23 kDa antigen, PGN_0336                         | hypothetical protein PG2155           | Peptidyl-prolyl cis-trans isomerase, PG_2164          |
| Minor component, FimC                                           | conserved hypothetical                | Uncharacterized protein,                              |

|                                                           |                                             |                                               |
|-----------------------------------------------------------|---------------------------------------------|-----------------------------------------------|
|                                                           | protein PG2175                              | PG_0491                                       |
| Immunoreactive 84 kDa antigen, PGN_0509                   | hypothetical protein PG2227                 | Uncharacterized protein, PG_1341              |
| DNA protection during starvation protein, Dps             | C-terminal signal peptidase, PorU           | Uncharacterized protein, PG_2168              |
| Por secretion system protein, PorQ                        | von Willebrand factor type A domain protein | Uncharacterized protein, PG_0654              |
|                                                           | hypothetical protein PG0183                 | Uncharacterized protein, PG_0937              |
| Heme-binding protein, FetB                                |                                             |                                               |
| Putative uncharacterized protein, PGN_0288                | zinc carboxypeptidase, CPG70                | Uncharacterized protein, PG_0217              |
| Putative uncharacterized protein, PGN_0296                | internalin-related protein                  | DNA protection during starvation protein, Dps |
| Putative uncharacterized protein, PGN_0322                | hemagglutinin, putative                     | Immunoreactive 84 kDa antigen, PG_1604        |
| TonB-dependent receptor, PGN_0741                         | hypothetical protein PG0495                 | Uncharacterized protein, PG_2172              |
| Putative uncharacterized protein, PGN_1735                | arginine-specific cysteine proteinase, RgpB | Uncharacterized protein, PG_1093              |
| Glyceraldehyde 3-phosphate dehydrogenase type I, PGN_0173 | extracellular protease, putative            | Uncharacterized protein, PG_0373              |
| Putative uncharacterized protein, PGN_1808                | hypothetical protein PG0611                 | Uncharacterized protein, PG_1634              |
| Putative uncharacterized protein, PGN_1823                | thioredoxin, putative, HBP35                | Uncharacterized protein, PG_0083              |
| Putative uncharacterized protein, PGN_0654                | hypothetical protein PG0626                 | Cobyrinic acid A,C-diamide synthase, CbiA     |
| FtsK/SpoIIIE family cell division protein, PGN_0487       | hypothetical protein PG0654                 | Uncharacterized protein, PG_1030              |
| TonB-linked receptor, Tlr, PGN_0683                       | hypothetical protein PG1030                 | TonB-dependent receptor, PG_0668              |
| Putative uncharacterized protein, PGN_0471                | immunoreactive antigen PG97, internalin     | Phosphoserine aminotransferase, SerC          |
| Putative uncharacterized protein, PGN_1010                | peptidylarginine deiminase                  | Uncharacterized protein, PG_1621              |
| Putative uncharacterized protein, PGN_0860                | thiol protease/hemagglutinin PrtT precursor | Uncharacterized protein, PG_0218              |
| Putative uncharacterized protein, PGN_1129                | thiol protease/hemagglutinin PrtT precursor | TPR domain protein, PG_1651                   |
| Putative uncharacterized protein, PGN_1514                | immunoreactive 84 kDa antigen PG93          | Putative cysteine peptidase, PG_1788          |
| Putative heat shock-related protease, HtrA                | hypothetical protein, P27 PG1795            | PorT protein                                  |
|                                                           | immunoreactive 46 kDa antigen PG99          | TPR domain protein, PG_0449                   |
|                                                           | hemagglutinin protein HagA                  | Thiol protease/hemagglutinin                  |

---

PrtT, PG\_1427

lysine-specific cysteine  
proteinase, Kgp  
hypothetical protein PG1969  
arginine-specific cysteine  
proteinase, RgpA  
immunoreactive 63 kDa  
antigen  
immunoreactive antigen  
PG91, P59, TapA  
hypothetical protein PG2172  
immunoreactive 32 kDa  
antigen PG25  
hypothetical protein PG2216  
hypothetical protein PG0031  
N-acetylmuramoyl-L-alanine  
amidase  
hypothetical protein PG0140  
hypothetical protein PG0216  
hypothetical protein PG0291  
hypothetical protein PG0419  
hypothetical protein PG0421  
hypothetical protein PG0569  
hypothetical protein PG0624  
hypothetical protein PG1185  
hypothetical protein PG1492  
hypothetical protein PG1621  
hypothetical protein PG1635  
TPR domain protein  
hypothetical protein PG2101  
hypothetical protein PG0626  
hypothetical protein PG0654  
hypothetical protein PG1030  
immunoreactive antigen  
PG97, internalin  
peptidylarginine deiminase  
thiol protease/hemagglutinin  
PrtT precursor  
thiol protease/hemagglutinin  
PrtT precursor  
immunoreactive 84 kDa  
antigen PG93  
hypothetical protein, P27  
PG1795

---

---

immunoreactive 46 kDa  
antigen PG99  
hemagglutinin protein HagA  
lysine-specific cysteine  
proteinase, Kgp  
hypothetical protein PG1969  
arginine-specific cysteine  
proteinase, RgpA  
immunoreactive 63 kDa  
antigen  
immunoreactive antigen  
PG91, P59, TapA  
hypothetical protein PG2172  
immunoreactive 32 kDa  
antigen PG25  
hypothetical protein PG2216  
hypothetical protein PG0031  
N-acetylmuramoyl-L-alanine  
amidase  
hypothetical protein PG0140  
hypothetical protein PG0216  
hypothetical protein PG0291  
hypothetical protein PG0419  
hypothetical protein PG0421  
hypothetical protein PG0569  
hypothetical protein PG0624  
hypothetical protein PG1185  
hypothetical protein PG1492  
hypothetical protein PG1621  
hypothetical protein PG1635  
TPR domain protein  
hypothetical protein PG2101

---

## References

1. Nakao R, Takashiba S, Kosono S *et al.*: Effect of Porphyromonas gingivalis outer membrane vesicles on gingipain-mediated detachment of cultured oral epithelial cells and immune responses. *Microbes and infection / Institut Pasteur* 16(1), 6-16 (2014).

2. Mantri CK, Chen CH, Dong X *et al.*: Fimbriae-mediated outer membrane vesicle production and invasion of *Porphyromonas gingivalis*. *Microbiologyopen* 4(1), 53-65 (2015).
3. Veith PD, Chen YY, Gorasia DG *et al.*: *Porphyromonas gingivalis* Outer Membrane Vesicles Exclusively Contain Outer Membrane and Periplasmic Proteins and Carry a Cargo Enriched with Virulence Factors. *Journal of proteome research*, (2014).
